# Supplementary material
Source: PubMed Central journal article supplement (PMC3149728)
Supplement: NIHMS288404-supplement-01.pdf [file NIHMS288404-supplement-01.pdf]

# Supplemental figure 1

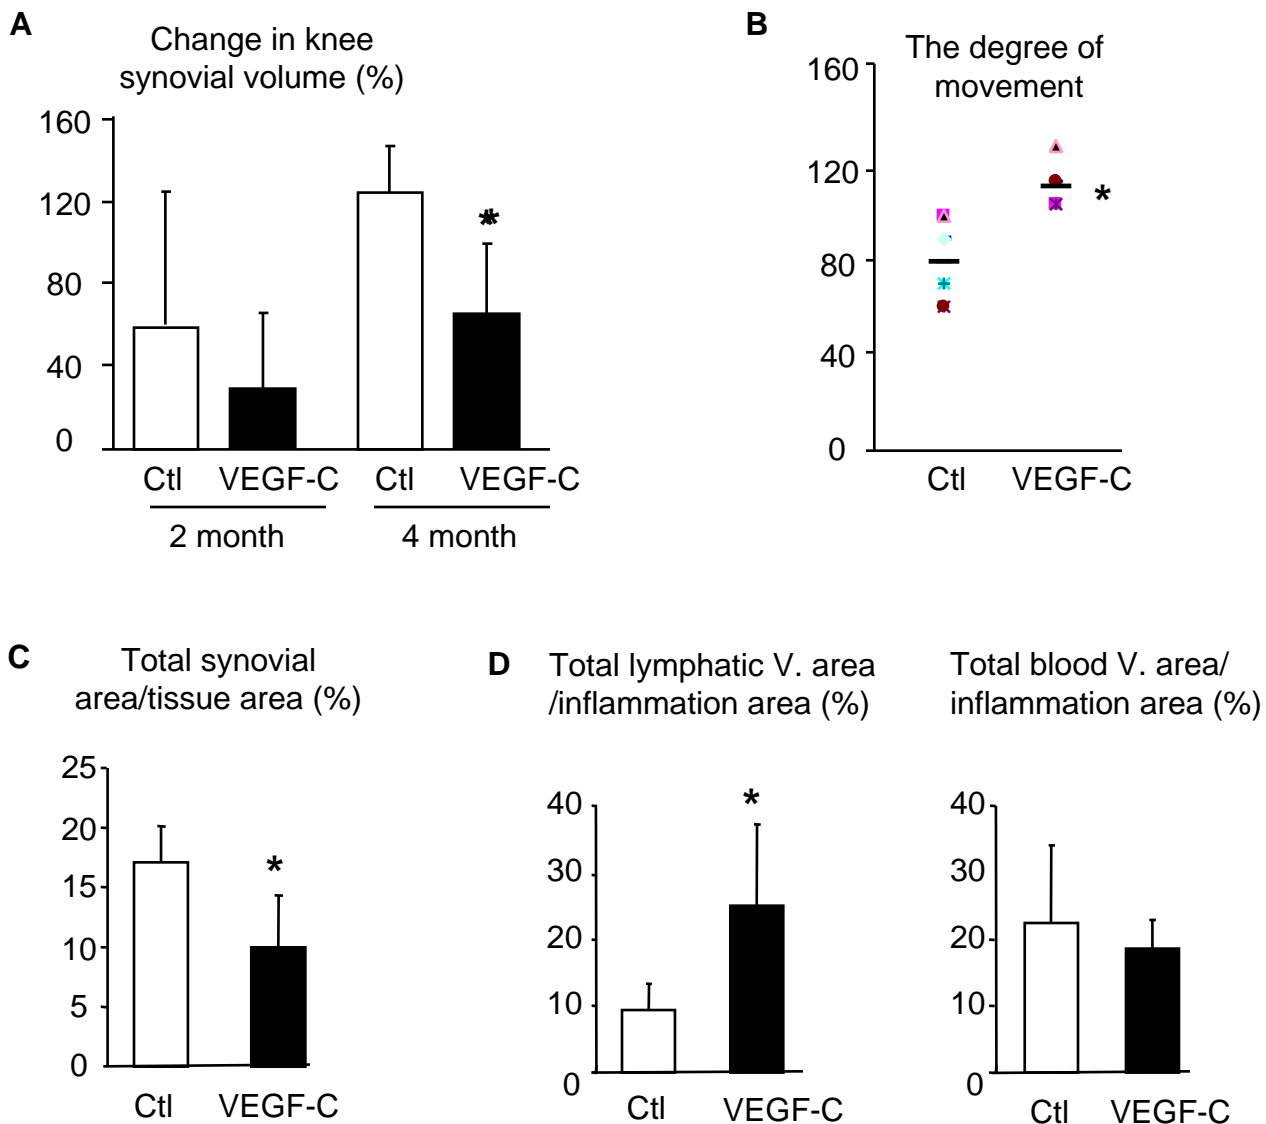

## Intra-articular injection of AAV-VEGF-C virus reduces joint tissue damage of TNF-Tg mice.

TNF-Tg mice received intra-articular injection of AAV-VEGF-C or AAV-Luc in the Knee joints at 1.5-month-old. (A) CE-MRI was performed on knee joints at baseline and 4 month post treatment. Percentage changes of synovial volume at 4 month compared to baseline value in the same animals was derived from the MRI imagining. (B) The degree of movement of knee Joints. (C) Histomorphometric analysis of joints. (D) IHC stained sections.
